# Supplementary material for: Morphometric analysis of the skull base and palatal regions for gender identification using CBCT: a retrospective study
Source: PeerJ. 2024 Sep 24;12:e18127. doi: 10.7717/peerj.18127 (PMC11430163; doi:10.7717/peerj.18127)
Supplement: Supplemental Information 1 [file peerj-12-18127-s001.xlsx]

## Sheet: Sheet1
Gender	HOCG	CL Clivus length	OCHR occip condyle height	OCH(L)	DBIAM int acc dist	DBCG&ATC dist cresta gali and ant tub sella	CCA (cliv canal angle)	BA	WORALOC	TDOFM	PH	PW
f	13.63mm	38.62mm	9.06mm	9.08mm	61.11mm	34.50mm	153.3	121.4	24.69mm	28.05mm	17.47mm	32.96mm
f	10.36mm	47.51mm	10.21mm	10.21mm	60.36mm	33.11mm	147.6	114.3	23.14mm	29.59mm	16.81mm	34.29mm
m	13.60mm	40.61mm	10.51mm	10.51mm	59.86mm	35.68mm	160.9	111.8	26.67mm	25.58mm	13.46mm	31.26mm
f	8.54mm	43.60mm	10.82mm	10.85mm	56.80mm	32.94mm	164.6	121.4	21.62mm	25.24mm	12.71mm	29.55mm
m	7.69mm	46.63mm	8.68mm	8.65mm	63.45mm	34.26mm	167.5	116.2	23.58mm	28.45mm	19.06mm	31.17mm
m	7.20mm	44.48mm	9.87mm	9.86mm	61.07mm	35.00mm	150.5	122.4	23.51mm	30.16mm	19.44mm	36.18mm
f	15.12mm	42.71mm	8.07mm	8.05mm	64.18mm	34.96mm	152.2	125.6	30.25mm	28.19mm	11.74mm	41.95mm
f	12.68mm	43.09mm	10.21mm	10.25mm	57.93mm	29.91mm	168.1	122.4	24.80mm	30.52mm	12.21mm	32.50mm
f	12.24mm	39.34mm	8.02mm	8.02mm	50.20mm	32.89mm	161.5	111.5	25.25mm	27.66mm	8.09mm	38.16mm
m	10.90mm	45.65mm	9.59mm	9.54mm	64.48mm	39.65mm	152.8	124	20.58mm	32.46mm	17.19mm	41.06mm
f	12.91mm	42.32mm	9.61mm	9.61mm	53.66mm	36.50mm	159.4	117.1	21.13mm	25.34mm	10.36mm	39.71mm
f	12.29mm	42.71mm	10.17mm	10.14mm	60.88mm	29.91mm	158.6	119.4	23.05mm	25.93mm	12.51mm	37.14mm
m	11.51mm	48.37mm	11.64mm	11.63mm	59.36mm	44.83mm	175.5	110.9	20.41mm	27.38mm	21.69mm	39.22mm
f	10.44mm	43.45mm	10.98mm	10.98mm	58.66mm	31.53mm	172.3	111.9	23.63mm	25.68mm	15.50mm	31.47mm
f	11.62mm	41.66mm	8.09mm	8.07mm	64.30mm	33.65mm	163.5	119.7	22.60mm	28.32mm	9.74mm	36.84mm
f	13.31mm	40.53mm	9.12mm	9.10mm	60.46mm	39.28mm	175.9	116.5	23.28mm	30.57mm	15.16mm	31.08mm
m	11.39mm	43.60mm	13.08mm	13.06mm	60.92mm	39.54mm	156.2	122.6	27.20mm	31.56mm	14.72mm	35.20mm
m	13.01mm	46.08mm	11.03mm	11.04mm	47.35mm	38.03mm	151.6	120.4	23.68mm	30.85mm	14.65mm	37.47mm
f	10.63mm	43.38mm	12.52mm	12.51mm	59.61mm	33.10mm	160.4	119.4	24.69mm	26.84mm	16.51mm	35.70mm
f	14.04mm	41.86mm	9.77mm	9.76mm	54.68mm	32.60mm	159.5	121.8	24.64mm	27.63mm	14.48mm	32.45mm
m	7.48mm	43.73mm	12.35mm	12.36mm	65.09mm	32.60mm	150.5	115.5	22.69mm	28.75mm	8.89mm	44.47mm
m	10.11mm	41.58mm	8.38mm	8.39mm	69.78mm	33.46mm	157.3	114.8	24.50mm	33.08mm	16.69m	31.91mm
f	9.14mm	41.11mm	8.75mm	8.78mm	62.34mm	33.60mm	159.4	128.1	22.59mm	29.30mm	10.73mm	33.46mm
f	12.34mm	41.33mm	9.97mm	9.97mm	52.30mm	31.65mm	not clear	127	20.13mm	27.32mm	11.74mm	34.90mm
f	8.30mm	37.42mm	9.23mm	9.24mm	56.35mm	32.51mm	167.7	113	22.58mm	27.65mm	12.22mm	34.53mm
f	8.24mm	43.71mm	10.48mm	10.49mm	57.60mm	33.27mm	148.6	121.7	24.76mm	31.01mm	15.02mm	31.01mm
m	9.68mm	44.32mm	9.54mm	9.54mm	58.84mm	36.91mm	155.1	116.3	22.4mm	30.44mm	17.79mm	34.66mm
f	10.75mm	42.76mm	9.48mm	9.49mm	61.84mm	30.99mm	163.8	115.3	22.05mm	29.96mm	15.37mm	39.70mm
m	3.74mm	46.03mm	11.33mm	11.35mm	60.55mm	32.89mm	155.5	119.2	23.77mm	29.71mm	14.31mm	34.30mm
f	14.90mm	39.15mm	10.51mm	10.54mm	63.39mm	30.89mm	145.4	124.1	25.94mm	30.01mm	9.95mm	27.22mm
m	14.69mm	45.98mm	11.93mm	11.92mm	64.34mm	31.60mm	163.1	115.1	23.27mm	29.23mm	13.59mm	31.27mm
m	8.76mm	45.06mm	10.36mm	10.32mm	61.28mm	36.10mm	156.1	116.2	23.16mm	28.69mm	11.53mm	42.18mm
f	6.34mm	35.80mm	9.80mm	9.80mm	59.36mm	28.69mm	152.4	128.7	26.01mm	28.34mm	14.47mm	37.30mm
f	11.02mm	34.00mm	8.49mm	8.49mm	63.88mm	29.83mm	167.5	114.4	23.29mm	26.27mm	14.90mm	34.96mm
f	12.58mm	40.59mm	8.51mm	8.51mm	60.60mm	31.35mm	163.1	118.4	22.39mm	27.13mm	11.46mm	35.69mm
m	8.22mm	42.97mm	9.39mm	9.39mm	60.69mm	33.31mm	168.5	119.5	25.37mm	32.86mm	18.09mm	37.85mm
m	8.37mm	41.25mm	11.21mm	11.23mm	59.90mm	32.0mm	172.4	118	20.42mm	28.51mm	17.82mm	35.42mm
m	11.82mm	46.53mm	12.42mm	12.43mm	54.46mm	35.06mm	153.8	123.5	19.49mm	25.56mm	8.68mm	42.15mm
f	8.08mm	41.00mm	9.22mm	9.20mm	66.46mm	34.60mm	153.8	117.9	28.90mm	33.00mm	11.39mm	40.82mm
f	12.04mm	41.57mm	12.70mm	12.71mm	52.71mm	32.34mm	157	115.7	24.95mm	28.55mm	11.66mm	33.51mm
m	11.23mm	47.29mm	9.68mm	9.66mm	67.07mm	37.14mm	159.9	117.6	29.23mm	31.31mm	12.11mm	29.72mm
m	9.44mm	47.90mm	9.18mm	9.17mm	59.07mm	31.20mm	159.2	117.7	23.50mm	32.11mm	15.99mm	44.90mm
f	8.22mm	46.32mm	8.38mm	8.38mm	62.82mm	37.99mm	137.5	122.7	24.56mm	34.06mm	12.85mm	31.97mm
m	9.00mm	43.24mm	16.13mm	16.13mm	53.85mm	35.74mm	150	122.3	24.64mm	28.11mm	9.07mm	40.17mm
m	8.27mm	45.49mm	8.86mm	8.86mm	61.31mm	28.16mm	164.8	117.4	24.68mm	27.23mm	12.70mm	32.71mm
m	12.69mm	46.25mm	8.43mm	8.43mm	63.06mm	34.30mm	169.1	112.6	23.90mm	29.89mm	17.91mm	41.71mm
f	10.94mm	42.71mm	10.33mm	10.32mm	59.94mm	31.99mm	164.1	120.1	20.62mm	28.92mm	12.51mm	39.07mm
f	9.82mm	40.18mm	8.32mm	8.32mm	58.66mm	27.76mm	174.4	121.1	23.82mm	29.76mm	11.22mm	33.42mm
f	7.90mm	43.27mm	10.59mm	10.60mm	58.88mm	27.74mm	155.4	125.5	24.88mm	28.37mm	13.06mm	35.34mm
f	10.15mm	43.84mm	8.61mm	8.63mm	59.93mm	36.15mm	142.4	121.7	24.70mm	29.21mm	13.80mm	31.20mm
m	15.31mm	38.94mm	8.18mm	8.19mm	61.33mm	29.69mm	161.3	115.9	24.65mm	29.03mm	8.03mm	32.32mm
m	15.62mm	40.06mm	9.75mm	9.70mm	56.26mm	38.39mm	156.7	121.8	28.26mm	31.86mm	19.01mm	35.33mm
m	12.10mm	43.22mm	10.68mm	10.70mm	48.98mm	38.38mm	151	118.9	22.95mm	31.36mm	11.08mm	30.02mm
f	14.96mm	43.96mm	9.50mm	9.50mm	55.70mm	29.66mm	155.9	123	23.18mm	29.94mm	17.39mm	34.96mm
f	10.96mm	40.34mm	6.87mm	6.87mm	51.32mm	36.71mm	158.8	125.7	24.19mm	30.12mm	13.62mm	30.08mm
m	15.90mm	44.42mm	10.24mm	10.24mm	62.96mm	33.15mm	153.5	122.1	28.55mm	30.81mm	11.21mm	36.39mm
f	10.90mm	42.41mm	9.19mm	9.17mm	59.12mm	32.05mm	159.6	118.1	23.96mm	23.86mm	13.03mm	37.74mm
f	9.11mm	40.57mm	10.68mm	10.68mm	64.55mm	33.25mm	157.2	125.6	22.18mm	29.18mm	7.47mm	30.80mm
m	11.84mm	42.22mm	9.35mm	9.35mm	54.01mm	37.06mm	154.3	122.3	23.86mm	29.01mm	17.10mm	34.64mm
m	6.98mm	42.12mm	11.97mm	11.97mm	53.53mm	33.63mm	176.9	110.5	25.84mm	28.76mm	21.90mm	34.58mm
f	11.55mm	47.98mm	9.69mm	9.64mm	60.16mm	34.71mm	172.3	117.7	19.76mm	24.96mm	11.50mm	37.86m
f	10.98mm	42.02mm	7.96mm	7.96mm	49.58mm	35.11mm	160.6	119.7	22.63mm	26.98mm	11.42mm	33.35mm
f	13.45mm	47.84mm	11.67mm	11.66mm	62.46mm	32.36mm	163.3	123.2	29.62mm	31.52mm	17.93mm	36.24mm
f	6.68mm	44.20mm	9.73mm	9.73mm	66.09mm	36.39mm	176.2	107.7	23.49mm	29.69mm	11.08mm	36.27mm
f	11.36mm	41.36mm	10.75mm	10.75mm	54.12mm	32.98mm	158.6	119.7	19.95mm	28.52mm	11.36mm	40.54mm
f	14.70mm	43.05mm	11.31mm	11.29mm	56.12mm	33.70mm	153.6	111.9	22.70mm	24.09mm	12.04mm	36.53mm
m	11.29mm	48.82mm	10.95mm	10.92mm	58.71mm	48.71mm	156.4	114.1	22.19mm	31.50mm	13.90mm	31.78mm
f	12.72mm	41.62mm	12.14mm	12.10mm	58.62mm	28.81mm	171.1	115.9	24.12mm	24.81mm	11.89mm	32.03mm
m	13.59mm	46.85mm	11.66mm	11.64mm	59.53mm	34.77mm	171.2	111.3	22.82mm	27.38mm	19.82mm	39.90mm
f	12.74mm	40.71mm	9.51mm	9.55mm	59.03mm	30.77mm	169.7	118.6	23.91mm	31.45mm	14.98mm	32.77mm
f	15.56mm	42.56mm	10.55mm	10.55mm	58.71mm	32.29mm	not clear	123.3	24.62mm	33.05mm	10.40mm	33.05mm
m	8.31mm	42.74mm	11.75mm	11.73mm	63.55mm	33.81mm	152.6	118.9	20.64mm	29.65mm	10.94mm	42.56mm
m	9.79mm	48.66mm	13.84mm	13.88mm	55.65mm	36.26mm	159.7	117.7	27.14mm	29.09mm	17.98mm	38.56mm
f	6.80mm	47.67mm	8.24mm	8.23mm	59.79mm	34.43mm	152.6	120.4	26.22mm	26.79mm	12.82mm	36.70mm
f	12.56mm	42.72mm	12.84mm	12.84mm	60.75mm	36.51mm	172.9	112.2	26.16mm	28.10mm	17.29mm	43.50mm
f	11.87mm	41.0mm	8.82mm	8.80mm	62.07mm	29.77mm	165.7	115.7	25.84mm	31.26mm	8.47mm	39.40mm
f	7.84mm	42.25mm	10.05mm	10.03mm	63.16mm	31.89mm	178.3	126.3	22.72mm	29.74mm	18.39mm	32.59mm
m	12.76mm	48.83mm	10.79mm	10.79mm	61.16mm	32.98mm	162.4	109.9	23.36mm	32.29mm	11.10mm	37.98mm
m	9.71mm	49.29mm	9.78mm	9.79mm	58.05mm	37.36mm	154.3	121.7	22.12mm	31.5mm	13.88mm	40.15mm
f	14.71mm	42.33mm	10.08mm	10.08mm	64.70mm	39.91mm	147.7	125.2	24.90mm	29.10mm	16.93mm	36.47mm
f	12.89mm	40.69mm	7.52mm	7.54mm	59.96mm	27.47mm	149.8	133.8	24.53mm	28.91mm	15.84mm	33.95mm
m	7.87mm	43.88mm	10.25mm	10.23mm	50.60mm	30.58mm	156.6	120.4	24.44mm	34.14mm	16.30mm	37.12mm
m	10.19mm	50.04mm	12.69mm	12.66mm	64.72mm	31.66mm	165.8	113.5	21.08mm	29.98mm	9.50mm	40.01mm
m	14.88mm	46.05mm	13.60mm	13.57mm	59.88mm	31.72mm	158.9	119.4	26.16mm	28.18mm	20.81mm	30.43mm
m	12.15mm	40.37mm	10.53mm	10.50mm	60.85mm	36.13mm	160.4	111.1	24.51mm	30.09mm	7.24mm	42.16mm
f	8.60mm	45.43mm	12.28mm	12.25mm	63.64mm	34.60mm	164.1	116.8	28.76mm	21.10mm	11.43mm	33.01mm
m	10.55mm	43.91mm	11.08mm	11.06mm	59.21mm	31.88mm	159.5	120.9	24.57mm	27.58mm	9.70mm	34.80mm
f	12.39mm	43.17mm	10.60mm	10.60mm	54.90mm	33.56mm	164.4	125.1	24.25mm	30.06mm	6.47mm	38.65mm
f	13.68mm	40.15mm	8.57mm	8.57mm	61.45mm	32.92mm	169.4	119.8	23.63mm	29.75mm	6.51mm	40.60mm
m	9.95mm	49.22mm	9.92mm	9.92mm	62.75mm	28.85mm	168.2	119.3	19.11mm	29.74mm	15.78mm	34.99mm
m	16.56mm	43.62mm	10.49mm	10.49mm	59.40mm	37.07mm	164	120.5	23.64mm	30.20mm	14.31mm	42.85mm
m	12.93mm	40.23mm	8.27mm	8.25mm	65.07mm	33.05mm	172.6	112.2	20.00mm	29.63mm	15.64mm	33.85mm
m	13.11mm	36.20mm	12.13mm	12.16mm	64.22mm	34.07mm	167	120.7	25.66mm	28.25mm	7.76mm	37.39mm
f	9.39mm	38.75mm	10.09mm	10.10mm	66.71mm	36.46mm	151.8	121.2	28.50mm	28.78mm	14.78mm	37.60mm
m	11.69mm	40.76mm	9.05mm	9.06mm	60.01mm	31.49mm	161.1	120.2	24.01mm	29.42mm	12.35mm	40.18mm
m	10.74mm	44.51mm	11.14mm	11.16mm	57.22mm	34.74mm	150.8	115	23.00mm	28.01mm	15.82mm	37.07mm
f	10.75mm	39.91mm	11.10mm	11.11mm	62.40mm	30.08mm	174	112.3	23.16mm	30.42mm	17.83mm	38.10mm
f	13.0mm	42.11mm	8.35mm	8.30mm	58.92mm	31.18mm	174.4	113.2	25.90mm	30.20mm	13.18mm	30.20mm
f	9.64mm	44.46mm	9.80mm	9.83mm	62.94mm	34.37mm	155.9	125.1	26.75mm	33.98mm	14.70mm	32.09mm
m	14.98mm	41.53mm	11.91mm	11.91mm	61.92mm	36.23mm	167.7	116.4	19.34mm	25.49mm	15.22mm	34.30mm
m	15.20mm	48.15mm	12.76mm	12.80mm	62.30mm	27.58mm	157.9	118.9	22.12mm	29.76mm	13.52mm	32.2mm
f	10.38mm	50.35mm	10.13mm	10.12mm	62.71mm	31.29mm	156.1	123.4	24.32mm	34.14mm	15.73mm	34.58mm
f	9.00mm	47.62mm	9.23mm	9.22mm	56.10mm	31.61mm	156.5	126.9	25.18mm	32.72mm	14.32mm	37.04mm
m	9.11mm	48.46mm	10.87mm	10.84mm	62.87mm	34.51mm	171.4	118.6	28.19mm	35.29mm	8.41mm	37.16mm
m	9.52mm	39.13mm	9.44mm	9.43mm	64.55mm	30.80mm	150	132.6	20.09mm	31.0mm	13.78mm	36.74mm
f	10.70mm	40.56mm	7.53mm	7.55mm	57.97mm	27.66mm	169.2	123.9	22.54mm	27.75mm	8.14mm	34.99mm
m	8.74mm	47.35mm	13.89mm	13.89mm	54.80mm	35.48mm	150.5	119.7	26.63mm	30.86mm	13.10mm	38.01mm
m	12.30mm	46.35mm	11.05mm	11.02mm	64.88mm	35.10mm	163.6	113.6	25.54mm	31.68mm	17.38mm	36.15mm
m	10.32mm	42.70mm	8.65mm	8.65mm	63.01mm	30.93mm	159.2	122.2	20.35mm	30.33mm	14.83mm	37.33mm
m	9.45mm	46.40mm	13.20mm	13.20mm	50.90mm	29.41mm	174.6	117.8	20.81mm	31.16mm	10.44mm	35.15mm
f	12.77mm	45.51mm	8.43mm	8.46mm	54.92mm	29.00mm	172.5	113.2	26.67mm	30.56mm	13.48mm	30.18mm
f	11.05mm	44.58mm	11.83mm	11.85mm	62.35mm	35.28mm	162.7	121.5	23.83mm	26.85mm	13.91mm	33.68mm
m	14.45mm	45.02mm	12.57mm	12.57mm	67.81mm	30.38mm	163.4	114.2	21.04mm	34.69mm	16.09mm	37.51mm
m	8.79mm	50.50mm	9.37mm	9.37mm	59.49mm	36.60mm	158.4	120.1	22.50mm	26.53mm	18.17mm	35.98mm
f	9.51mm	39.20mm	9.18mm	9.16mm	67.23mm	30.19mm	146.1	128	29.75mm	32.18mm	14.05mm	35.12mm
f	7.51mm	40.68mm	10.46mm	10.46m	68.60mm	29.18mm	171.4	113.7	25.71mm	29.14mm	15.48mm	32.68mm
m	8.61mm	47.64mm	12.52mm	12.54mm	53.20mm	35.16mm	176.2	120	26.85mm	31.96mm	18.16mm	36.31mm
m	10.85mm	40.88mm	11.11mm	11.11mm	61.58mm	34.23mm	171.8	112.8	29.33mm	32.69mm	16.76mm	33.52mm
m	12.92mm	45.61mm	12.29mm	12.30mm	56.90mm	33.98mm	173.1	119.3	24.05mm	29.81mm	11.68mm	38.48mm
m	14.04mm	38.52mm	9.75mm	9.75mm	57.96mm	29.01mm	167.7	119	25.87mm	27.73mm	16.51mm	35.12mm
f	14.63mm	40.04mm	9.80mm	9.81mm	61.06mm	30.47mm	146.1	124.5	24.02mm	26.10mm	16.20mm	34.42mm
m	12.91mm	50.45mm	11.93mm	11.96mm	58.46mm	39.62mm	172.5	110.9	21.00mm	28.02mm	16.11mm	37.46mm
m	8.32mm	45.39mm	10.52mm	10.49mm	63.26mm	33.29mm	168.9	119.5	21.00mm	27.11mm	17.53mm	37.06mm
m	9.92mm	44.32mm	13.28mm	13.28mm	62.00mm	35.27mm	159.5	126.8	19.88mm	27.72mm	9.45mm	39.53mm
m	8.37mm	46.06mm	11.24mm	11.21mm	58.62mm	37.22mm	162.6	120.9	23.46mm	32.55mm	20.60mm	43.57mm
f	10.24mm	43.47mm	11.10mm	11.07mm	60.32mm	33.09mm	172.7	119.7	22.95mm	25.97mm	8.72mm	40.09mm
f	12.72mm	44.57mm	9.13mm	9.17mm	61.31mm	35.58mm	166.8	116.4	30.49mm	32.48mm	16.91mm	35.02mm
f	9.73mm	46.05mm	11.51mm	11.51mm	69.69mm	34.45mm	161	117.6	24.06mm	33.79mm	13.05mm	37.64mm
f	8.76mm	48.30mm	10.53mm	10.55mm	62.90mm	36.09mm	141.7	130.2	24.20mm	26.82mm	17.57mm	36.09mm
f	13.48mm	47.24mm	11.75mm	11.74mm	61.68mm	29.07mm	164.9	119.6	28.63mm	29.80mm	17.31mm	34.98mm
m	16.15mm	40.70mm	11.61mm	11.61mm	65.65mm	32.90mm	172.5	114.3	23.13mm	29.08mm	11.93mm	44.74mm
m	13.62mm	47.22mm	12.73mm	12.73mm	64.41mm	34.24mm	169.5	114	24.36mm	34.29mm	21.46mm	42.17mm
f	9.91mm	43.33mm	10.46mm	10.42mm	56.43mm	34.39mm	153	124.2	25.75mm	33.30mm	13.51mm	37.60mm
m	10.07mm	41.68mm	12.46mm	12.42mm	60.62mm	31.08mm	150.4	122	27.57mm	30.10mm	18.08mm	35.21mm
m	9.78mm	42.02mm	11.28mm	11.28mm	64.11mm	36.78mm	166.4	125.7	22.45mm	30.44mm	19.73mm	36.30mm
m	9.41mm	47.65mm	11.33mm	11.36mm	59.42mm	35.91mm	168.1	113.5	26.42mm	24.74mm	17.41mm	35.33mm
m	8.28mm	48.27mm	13.41mm	13.41mm	59.69mm	39.20mm	175	111.4	22.69mm	31.37mm	13.99mm	39.09mm
m	10.37mm	47.45mm	11.63mm	11.60mm	68.16mm	31.38mm	145	126	25.17mm	32.63mm	15.74mm	37.69mm
m	9.30mm	46.06mm	12.22mm	12.26mm	52.97mm	31.06mm	174.4	118.2	23.57mm	36.95mm	21.15mm	41.14mm
m	8.78mm	43.98mm	11.05mm	11.05mm	63.49mm	34.44mm	156.6	119.6	25.03mm	36.80mm	15.41mm	35.49mm
m	7.92mm	47.03mm	11.10mm	11.10mm	67.31mm	33.89mm	175.2	121.3	24.66mm	33.16mm	14.44mm	41.30mm
f	8.29mm	41.0mm	9.62mm	9.62mm	62.58mm	36.26mm	162.4	125.7	21.29mm	24.79mm	15.62mm	28.54mm
